# Supplementary material for: Do Tonkean macaques (Macaca tonkeana) perceive what conspecifics do and do not see?
Source: PeerJ. 2016 Feb 22;4:e1693. doi: 10.7717/peerj.1693 (PMC4768696; doi:10.7717/peerj.1693)
Supplement: Supplemental Information 1 [file peerj-04-1693-s001.xlsx]

## Sheet: legende
N_Cond	running order of the related condition
N_Essai	Number of trial
Dom	Dominant
Sub	Subordinate
Cond	Condition (1, 2, 3 or 4)
D_Dir	Dominant first choice of direction; c=towards hidden banana and v=towards visible banana
S_Dir	subordinate first choice of direction; c=towards hidden banana and v=towards visible banana
D_Cache	Does the dominant obtained hidden banana? c=yes, non=no
D_Visible	Does the dominant obtained visible banana? v=yes, non=no
S_Cache	Does the subordinate obtained the hidden banana? c=yes, non=no
S_Visible	Does the subordinate obtained the visible banana? v=yes, non=no
Outcome	1=Dominant obtained two bananas, 2=Subordinate obtained two bananas, 3=Dominant obtained the visible banana and the subordinate obtained the hidden banana, 4=Dominant obtained the hidden banana and the subordinate obtained the visible banana

## Sheet: data
N_cond	N_Essai	Dom	Sub	Hierarchical rank difference	Cond	D_Dir	S_Dir	D_Cache	D_Visible	S_Cache	S_Visible	Outcome
1	8	Wallace	Yannick	8	1	v	Aucun	c	v	non	non	1
2	11	Wallace	Yannick	8	1	v	Aucun	non	v	c	non	3
3	13	Wallace	Yannick	8	1	v	c	non	v	c	non	3
4	22	Wallace	Yannick	8	1	v	c	non	v	c	non	3
5	23	Wallace	Yannick	8	1	v	c	non	v	c	non	3
6	24	Wallace	Yannick	8	1	v	c	non	v	c	non	3
7	32	Wallace	Yannick	8	1	v	Aucun	non	v	c	non	3
8	34	Wallace	Yannick	8	1	v	Aucun	non	v	c	non	3
9	36	Wallace	Yannick	8	1	v	Aucun	non	v	c	non	3
10	38	Wallace	Yannick	8	1	v	Aucun	non	v	c	non	3
1	8	Wotan	Yannick	4	1	v	c	non	v	c	non	3
2	11	Wotan	Yannick	4	1	v	Aucun	non	v	c	non	3
3	13	Wotan	Yannick	4	1	v	Aucun	non	v	c	non	3
4	22	Wotan	Yannick	4	1	v	Aucun	non	v	c	non	3
5	23	Wotan	Yannick	4	1	v	c	non	v	c	non	3
6	24	Wotan	Yannick	4	1	v	c	non	v	c	non	3
7	32	Wotan	Yannick	4	1	v	Aucun	non	v	c	non	3
8	34	Wotan	Yannick	4	1	v	Aucun	non	v	c	non	3
9	36	Wotan	Yannick	4	1	v	c	non	v	c	non	3
10	38	Wotan	Yannick	4	1	Aucun	c	non	non	c	v	2
11	45	Wotan	Yannick	4	1	v	c	non	v	c	non	3
12	46	Wotan	Yannick	4	1	v	c	non	v	c	non	3
13	50	Wotan	Yannick	4	1	v	c	non	v	c	non	3
14	52	Wotan	Yannick	4	1	v	c	non	v	c	non	3
15	53	Wotan	Yannick	4	1	v	c	non	v	c	non	3
16	59	Wotan	Yannick	4	1	v	c	non	v	c	non	3
17	65	Wotan	Yannick	4	1	v	c	non	v	c	non	3
18	68	Wotan	Yannick	4	1	v	c	non	v	c	non	3
19	71	Wotan	Yannick	4	1	v	c	non	v	c	non	3
20	79	Wotan	Yannick	4	1	Aucun	v	non	non	c	v	2
1	8	Walt	Yannick	3	1	v	v	non	v	c	non	3
2	11	Walt	Yannick	3	1	v	Aucun	non	v	c	non	3
3	13	Walt	Yannick	3	1	v	c	non	v	c	non	3
1	4	Lady	Yannick	1	1	v	c	non	v	c	non	3
2	8	Lady	Yannick	1	1	v	c	non	v	c	non	3
3	13	Lady	Yannick	1	1	v	c	non	v	c	non	3
1	2	Nereis	Lady	4	1	v	c	non	v	c	non	3
2	3	Nereis	Lady	4	1	v	c	non	v	c	non	3
3	11	Nereis	Lady	4	1	v	Aucun	non	v	c	non	3
1	8	Walt	Lady	2	1	v	c	non	v	c	non	3
2	11	Walt	Lady	2	1	v	c	non	v	c	non	3
3	22	Walt	Lady	2	1	v	c	non	v	c	non	3
4	23	Walt	Lady	2	1	v	c	non	v	c	non	3
5	24	Walt	Lady	2	1	v	c	non	v	c	non	3
6	32	Walt	Lady	2	1	v	c	non	v	c	non	3
7	34	Walt	Lady	2	1	v	c	non	v	c	non	3
8	36	Walt	Lady	2	1	v	c	non	v	c	non	3
9	38	Walt	Lady	2	1	v	c	non	v	c	non	3
1	8	Wotan	Lady	3	1	v	c	non	v	c	non	3
2	11	Wotan	Lady	3	1	v	c	non	v	c	non	3
3	13	Wotan	Lady	3	1	v	c	non	v	c	non	3
4	22	Wotan	Lady	3	1	v	c	non	v	c	non	3
5	23	Wotan	Lady	3	1	v	c	non	v	c	non	3
6	24	Wotan	Lady	3	1	v	c	non	v	c	non	3
7	32	Wotan	Lady	3	1	v	c	non	v	c	non	3
8	34	Wotan	Lady	3	1	v	v	non	v	c	non	3
9	36	Wotan	Lady	3	1	v	c	non	v	c	non	3
10	38	Wotan	Lady	3	1	v	c	non	v	c	non	3
11	45	Wotan	Lady	3	1	v	c	non	v	c	non	3
12	46	Wotan	Lady	3	1	v	c	non	v	c	non	3
13	50	Wotan	Lady	3	1	v	c	non	v	c	non	3
14	52	Wotan	Lady	3	1	v	c	non	v	c	non	3
15	53	Wotan	Lady	3	1	v	c	non	v	c	non	3
16	59	Wotan	Lady	3	1	v	c	non	v	c	non	3
1	8	Nema	Lady	2	1	v	c	non	v	c	non	3
2	13	Nema	Lady	2	1	v	c	c	non	non	v	4
3	22	Nema	Lady	2	1	v	c	non	v	c	non	3
4	23	Nema	Lady	2	1	v	Aucun	non	v	c	non	3
5	24	Nema	Lady	2	1	v	Aucun	non	v	c	non	3
6	31	Nema	Lady	2	1	v	c	non	v	c	non	3
7	33	Nema	Lady	2	1	v	c	non	v	c	non	3
8	35	Nema	Lady	2	1	v	c	non	v	c	non	3
9	37	Nema	Lady	2	1	v	c	non	v	c	non	3
10	44	Nema	Lady	2	1	v	c	non	v	c	non	3
11	45	Nema	Lady	2	1	Aucun	c	non	non	c	v	2
1	8	Vishnu	Yannick	7	1	v	c	non	v	c	non	3
2	11	Vishnu	Yannick	7	1	v	c	non	v	c	non	3
3	13	Vishnu	Yannick	7	1	v	Aucun	non	v	c	non	3
4	22	Vishnu	Yannick	7	1	v	c	non	v	c	non	3
5	23	Vishnu	Yannick	7	1	v	Aucun	c	v	non	non	1
6	24	Vishnu	Yannick	7	1	v	Aucun	c	v	non	non	1
7	32	Vishnu	Yannick	7	1	v	Aucun	c	v	non	non	1
1	8	Lady	Nenno	7	1	v	c	non	v	c	non	3
2	11	Lady	Nenno	7	1	v	c	non	v	c	non	3
3	13	Lady	Nenno	7	1	v	v	non	v	c	non	3
4	22	Lady	Nenno	7	1	v	c	non	v	c	non	3
5	23	Lady	Nenno	7	1	v	v	non	v	c	non	3
6	24	Lady	Nenno	7	1	v	c	non	v	c	non	3
7	29	Lady	Nenno	7	1	v	v	non	non	c	v	2
1	13	Shan	Yannick	12	1	v	Aucun	non	v	c	non	3
2	14	Shan	Yannick	12	1	v	c	non	v	c	non	3
3	23	Shan	Yannick	12	1	v	c	non	v	c	non	3
4	24	Shan	Yannick	12	1	v	c	non	v	c	non	3
5	32	Shan	Yannick	12	1	c	c	non	v	c	non	3
6	34	Shan	Yannick	12	1	v	c	non	v	c	non	3
7	36	Shan	Yannick	12	1	v	c	c	v	non	non	1
8	38	Shan	Yannick	12	1	v	c	non	v	c	non	3
1	1	Wallace	Vishnu	1	1	v	c	non	v	c	non	3
2	8	Wallace	Vishnu	1	1	v	c	non	v	c	non	3
3	13	Wallace	Vishnu	1	1	v	c	non	v	c	non	3
1	2	Wallace	Yannick	8	2	Aucun	v	non	non	c	v	2
2	4	Wallace	Yannick	8	2	v	Aucun	non	v	c	non	3
3	12	Wallace	Yannick	8	2	v	c	non	v	c	non	3
4	14	Wallace	Yannick	8	2	Aucun	Aucun	non	non	c	v	2
5	16	Wallace	Yannick	8	2	v	c	non	v	c	non	3
6	17	Wallace	Yannick	8	2	v	Aucun	non	v	c	non	3
7	40	Wallace	Yannick	8	2	v	Aucun	non	v	c	non	3
8	42	Wallace	Yannick	8	2	v	v	c	v	non	non	1
1	9	Wotan	Yannick	4	2	v	c	non	v	c	non	3
2	14	Wotan	Yannick	4	2	v	c	non	v	c	non	3
3	16	Wotan	Yannick	4	2	v	c	non	v	c	non	3
4	29	Wotan	Yannick	4	2	v	c	non	v	c	non	3
5	40	Wotan	Yannick	4	2	Aucun	c	non	non	c	v	2
6	42	Wotan	Yannick	4	2	v	c	non	v	c	non	3
7	44	Wotan	Yannick	4	2	Aucun	c	non	v	c	non	3
8	48	Wotan	Yannick	4	2	v	c	non	v	c	non	3
9	49	Wotan	Yannick	4	2	v	c	non	v	c	non	3
10	55	Wotan	Yannick	4	2	v	c	non	v	c	non	3
11	57	Wotan	Yannick	4	2	v	c	non	v	c	non	3
12	61	Wotan	Yannick	4	2	Aucun	v	non	non	c	v	2
13	78	Wotan	Yannick	4	2	v	v	non	v	c	non	3
14	80	Wotan	Yannick	4	2	v	v	non	non	c	v	2
1	2	Uruk	Yannick	11	2	Aucun	c	non	v	c	non	3
2	3	Uruk	Yannick	11	2	v	Aucun	c	v	non	non	1
1	2	Wallace	Lady	7	2	v	c	c	v	non	non	1
2	3	Wallace	Lady	7	2	v	c	non	v	c	non	3
3	4	Wallace	Lady	7	2	v	v	non	v	c	non	3
1	2	Walt	Yannick	3	2	Aucun	c	non	non	c	v	2
2	4	Walt	Yannick	3	2	Aucun	v	non	non	c	v	2
3	9	Walt	Yannick	3	2	Aucun	v	non	non	c	v	2
4	12	Walt	Yannick	3	2	v	c	non	v	c	non	3
5	14	Walt	Yannick	3	2	v	v	non	v	c	non	3
1	2	Lady	Yannick	1	2	v	c	non	v	c	non	3
2	3	Lady	Yannick	1	2	v	c	non	v	c	non	3
3	9	Lady	Yannick	1	2	v	c	non	v	c	non	3
4	11	Lady	Yannick	1	2	v	c	non	non	c	v	2
5	12	Lady	Yannick	1	2	v	c	non	v	c	non	3
6	14	Lady	Yannick	1	2	Aucun	v	non	non	c	v	2
1	2	Yannick	Nema	1	2	Aucun	c	non	v	c	non	3
2	3	Yannick	Nema	1	2	v	v	non	v	c	non	3
3	4	Yannick	Nema	1	2	Aucun	c	non	v	c	non	3
1	4	Nereis	Lady	4	2	v	c	non	v	c	non	3
2	8	Nereis	Lady	4	2	v	c	c	v	non	non	1
3	9	Nereis	Lady	4	2	v	c	non	v	c	non	3
1	2	Walt	Lady	2	2	v	c	non	v	c	non	3
2	3	Walt	Lady	2	2	v	c	non	v	c	non	3
3	4	Walt	Lady	2	2	v	v	c	v	non	non	1
4	9	Walt	Lady	2	2	v	Aucun	non	v	c	non	3
5	12	Walt	Lady	2	2	v	c	non	v	c	non	3
6	13	Walt	Lady	2	2	Aucun	v	non	non	c	v	2
7	14	Walt	Lady	2	2	v	v	non	v	c	non	3
8	16	Walt	Lady	2	2	v	c	non	v	c	non	3
9	17	Walt	Lady	2	2	v	c	non	v	c	non	3
10	29	Walt	Lady	2	2	v	c	non	v	c	non	3
11	40	Walt	Lady	2	2	v	c	non	v	c	non	3
1	3	Uruk	Wotan	7	2	v	c	c	v	non	non	1
1	2	Nereis	Yannick	5	2	v	v	non	v	c	non	3
1	2	Wallace	Nereis	3	2	v	c	non	v	c	non	3
2	3	Wallace	Nereis	3	2	v	c	non	v	c	non	3
3	4	Wallace	Nereis	3	2	v	c	non	v	c	non	3
1	2	Wotan	Lady	3	2	Aucun	c	non	non	c	v	2
2	3	Wotan	Lady	3	2	v	c	non	v	c	non	3
3	4	Wotan	Lady	3	2	v	c	non	v	c	non	3
4	9	Wotan	Lady	3	2	v	c	non	v	c	non	3
5	12	Wotan	Lady	3	2	v	c	non	v	c	non	3
6	14	Wotan	Lady	3	2	v	c	non	v	c	non	3
7	16	Wotan	Lady	3	2	v	c	non	v	c	non	3
8	17	Wotan	Lady	3	2	v	c	non	v	c	non	3
9	29	Wotan	Lady	3	2	v	c	non	v	c	non	3
10	40	Wotan	Lady	3	2	v	c	non	v	c	non	3
11	42	Wotan	Lady	3	2	v	v	non	non	c	v	2
12	44	Wotan	Lady	3	2	v	c	non	v	c	non	3
13	48	Wotan	Lady	3	2	v	c	non	v	c	non	3
14	49	Wotan	Lady	3	2	v	c	non	v	c	non	3
15	51	Wotan	Lady	3	2	v	v	non	v	c	non	3
16	55	Wotan	Lady	3	2	v	v	non	non	c	v	2
17	57	Wotan	Lady	3	2	v	c	non	v	c	non	3
18	61	Wotan	Lady	3	2	v	c	non	v	c	non	3
1	1	Nema	Lady	2	2	Aucun	v	non	non	c	v	2
2	2	Nema	Lady	2	2	v	c	non	v	c	non	3
3	3	Nema	Lady	2	2	v	c	non	v	c	non	3
4	9	Nema	Lady	2	2	v	v	non	non	c	v	2
5	11	Nema	Lady	2	2	v	c	non	v	c	non	3
6	12	Nema	Lady	2	2	v	v	non	non	c	v	2
7	14	Nema	Lady	2	2	v	c	non	v	c	non	3
8	16	Nema	Lady	2	2	v	c	non	v	c	non	3
9	17	Nema	Lady	2	2	v	c	non	v	c	non	3
10	28	Nema	Lady	2	2	v	v	non	non	c	v	1
11	39	Nema	Lady	2	2	v	v	non	non	c	v	2
12	41	Nema	Lady	2	2	Aucun	v	non	non	c	v	2
13	43	Nema	Lady	2	2	Aucun	v	non	non	c	v	2
1	4	Wallace	Nema	9	2	Aucun	c	non	v	c	non	3
1	2	Vishnu	Yannick	7	2	v	c	non	v	c	non	3
2	3	Vishnu	Yannick	7	2	v	c	non	v	c	non	3
3	4	Vishnu	Yannick	7	2	v	c	non	v	c	non	3
4	9	Vishnu	Yannick	7	2	v	c	non	v	c	non	3
5	12	Vishnu	Yannick	7	2	v	c	non	v	c	non	3
6	14	Vishnu	Yannick	7	2	v	c	non	v	c	non	3
7	16	Vishnu	Yannick	7	2	Aucun	c	non	v	c	non	3
8	17	Vishnu	Yannick	7	2	v	v	non	v	c	non	3
1	2	Lady	Nenno	7	2	Aucun	v	non	non	c	v	2
2	3	Lady	Nenno	7	2	Aucun	c	non	v	c	non	3
3	4	Lady	Nenno	7	2	Aucun	v	non	non	c	v	2
4	9	Lady	Nenno	7	2	Aucun	v	non	non	c	v	2
5	12	Lady	Nenno	7	2	v	c	non	v	c	non	3
6	14	Lady	Nenno	7	2	v	c	non	v	c	non	3
7	16	Lady	Nenno	7	2	Aucun	v	non	non	c	v	2
8	17	Lady	Nenno	7	2	Aucun	v	non	non	c	v	2
1	1	Wallace	Wotan	4	2	v	c	non	v	c	non	3
2	2	Wallace	Wotan	4	2	v	c	non	v	c	non	3
1	2	Shan	Yannick	12	2	v	c	non	v	c	non	3
2	3	Shan	Yannick	12	2	v	Aucun	non	v	c	non	3
3	16	Shan	Yannick	12	2	v	c	c	v	non	non	1
4	17	Shan	Yannick	12	2	v	c	c	v	non	non	1
5	22	Shan	Yannick	12	2	v	v	c	v	non	non	1
6	29	Shan	Yannick	12	2	Aucun	c	non	v	c	v	2
7	40	Shan	Yannick	12	2	v	v	non	v	c	v	2
1	2	Wallace	Vishnu	1	2	v	c	non	v	c	non	3
2	3	Wallace	Vishnu	1	2	v	c	non	v	c	non	3
3	4	Wallace	Vishnu	1	2	v	c	non	v	c	non	3
4	9	Wallace	Vishnu	1	2	v	c	non	v	c	non	3
5	12	Wallace	Vishnu	1	2	v	c	non	v	c	non	3
6	14	Wallace	Vishnu	1	2	v	c	non	v	c	non	3
7	16	Wallace	Vishnu	1	2	v	v	c	v	non	non	1
8	17	Wallace	Vishnu	1	2	v	c	non	v	c	non	3
1	6	Wallace	Yannick	8	3	v	Aucun	c	v	non	non	1
2	7	Wallace	Yannick	8	3	c	Aucun	c	v	non	non	1
3	15	Wallace	Yannick	8	3	v	Aucun	c	v	non	non	1
4	25	Wallace	Yannick	8	3	c	Aucun	c	v	non	non	1
5	30	Wallace	Yannick	8	3	v	Aucun	c	v	non	non	1
6	31	Wallace	Yannick	8	3	v	Aucun	c	v	non	non	1
7	41	Wallace	Yannick	8	3	c	Aucun	c	v	non	non	1
1	6	Wotan	Yannick	4	3	c	Aucun	c	v	non	non	1
2	10	Wotan	Yannick	4	3	c	Aucun	c	v	non	non	1
3	25	Wotan	Yannick	4	3	c	Aucun	c	v	non	non	1
4	30	Wotan	Yannick	4	3	c	Aucun	c	v	non	non	1
5	31	Wotan	Yannick	4	3	v	Aucun	c	v	non	non	1
6	41	Wotan	Yannick	4	3	c	Aucun	c	v	non	non	1
7	66	Wotan	Yannick	4	3	c	v	c	v	non	non	1
8	67	Wotan	Yannick	4	3	c	v	c	non	non	v	4
9	70	Wotan	Yannick	4	3	c	Aucun	c	v	non	non	1
10	73	Wotan	Yannick	4	3	c	v	c	v	non	non	1
11	74	Wotan	Yannick	4	3	c	Aucun	c	v	non	non	1
1	6	Wallace	Lady	7	3	v	Aucun	c	v	non	non	1
2	7	Wallace	Lady	7	3	c	Aucun	c	v	non	non	1
1	6	Walt	Yannick	3	3	c	v	c	v	non	non	1
2	7	Walt	Yannick	3	3	v	Aucun	c	v	non	non	1
3	10	Walt	Yannick	3	3	v	Aucun	c	v	non	non	1
4	15	Walt	Yannick	3	3	v	Aucun	c	v	non	non	1
1	6	Lady	Yannick	1	3	v	Aucun	c	v	non	non	1
2	7	Lady	Yannick	1	3	c	v	c	non	non	v	4
3	10	Lady	Yannick	1	3	v	Aucun	c	v	non	non	1
4	15	Lady	Yannick	1	3	c	v	c	non	non	v	4
1	6	Yannick	Nema	1	3	c	Aucun	c	v	non	non	1
1	6	Nereis	Lady	4	3	c	Aucun	c	v	non	non	1
2	7	Nereis	Lady	4	3	c	v	c	v	non	non	1
3	10	Nereis	Lady	4	3	c	Aucun	c	v	non	non	1
1	6	Walt	Lady	2	3	c	c	c	v	non	non	1
2	7	Walt	Lady	2	3	c	Aucun	c	v	non	non	1
3	10	Walt	Lady	2	3	v	Aucun	c	v	non	non	1
4	15	Walt	Lady	2	3	v	v	c	v	non	non	1
5	21	Walt	Lady	2	3	c	Aucun	c	v	non	non	1
6	25	Walt	Lady	2	3	c	Aucun	c	v	non	non	1
7	27	Walt	Lady	2	3	c	Aucun	c	v	non	non	1
8	30	Walt	Lady	2	3	c	Aucun	c	v	non	non	1
9	31	Walt	Lady	2	3	v	Aucun	c	v	non	non	1
1	6	Wallace	Nereis	3	3	c	Aucun	c	v	non	non	1
2	7	Wallace	Nereis	3	3	v	Aucun	c	v	non	non	1
1	6	Wotan	Lady	3	3	c	Aucun	c	v	non	non	1
2	7	Wotan	Lady	3	3	c	Aucun	c	v	non	non	1
3	10	Wotan	Lady	3	3	c	v	c	v	non	non	1
4	15	Wotan	Lady	3	3	v	Aucun	c	v	non	non	1
5	20	Wotan	Lady	3	3	c	v	c	non	non	v	4
6	21	Wotan	Lady	3	3	c	Aucun	c	v	non	non	1
7	25	Wotan	Lady	3	3	c	Aucun	c	v	non	non	1
8	27	Wotan	Lady	3	3	v	Aucun	c	v	non	non	1
9	30	Wotan	Lady	3	3	v	v	c	v	non	non	1
10	31	Wotan	Lady	3	3	c	v	c	non	non	v	4
11	41	Wotan	Lady	3	3	c	v	c	v	non	non	1
12	47	Wotan	Lady	3	3	c	Aucun	c	v	non	non	1
13	54	Wotan	Lady	3	3	c	Aucun	c	v	non	non	1
14	56	Wotan	Lady	3	3	v	Aucun	c	v	non	non	1
15	58	Wotan	Lady	3	3	v	Aucun	non	v	non	non	5
1	6	Nema	Lady	2	3	c	v	c	v	non	non	1
2	7	Nema	Lady	2	3	c	v	c	non	non	v	4
3	10	Nema	Lady	2	3	c	Aucun	c	v	non	non	1
4	15	Nema	Lady	2	3	v	Aucun	c	v	non	non	1
5	20	Nema	Lady	2	3	c	Aucun	c	v	non	non	1
6	21	Nema	Lady	2	3	c	Aucun	c	v	non	non	1
7	26	Nema	Lady	2	3	c	Aucun	c	v	non	non	4
8	29	Nema	Lady	2	3	c	Aucun	c	v	non	non	1
9	30	Nema	Lady	2	3	c	Aucun	c	v	non	non	1
10	40	Nema	Lady	2	3	v	v	c	v	non	non	1
1	6	Wallace	Nema	9	3	v	Aucun	c	v	non	non	1
2	7	Wallace	Nema	9	3	c	Aucun	c	v	non	non	1
1	6	Vishnu	Yannick	7	3	c	Aucun	c	v	non	non	1
2	7	Vishnu	Yannick	7	3	v	Aucun	c	v	non	non	1
3	10	Vishnu	Yannick	7	3	v	Aucun	c	v	non	non	1
4	15	Vishnu	Yannick	7	3	c	Aucun	c	v	non	non	1
5	20	Vishnu	Yannick	7	3	c	Aucun	c	v	non	non	1
6	21	Vishnu	Yannick	7	3	c	Aucun	c	v	non	non	1
7	25	Vishnu	Yannick	7	3	c	Aucun	c	v	non	non	1
8	27	Vishnu	Yannick	7	3	v	Aucun	c	v	non	non	1
9	30	Vishnu	Yannick	7	3	c	Aucun	c	v	non	non	1
10	31	Vishnu	Yannick	7	3	c	v	c	v	non	non	1
1	6	Lady	Nenno	7	3	v	Aucun	c	v	non	non	1
2	7	Lady	Nenno	7	3	v	Aucun	c	v	non	non	1
3	10	Lady	Nenno	7	3	c	v	c	v	non	non	1
4	15	Lady	Nenno	7	3	c	Aucun	c	v	non	non	1
5	20	Lady	Nenno	7	3	c	Aucun	c	v	non	non	1
6	21	Lady	Nenno	7	3	c	v	c	non	non	v	4
7	25	Lady	Nenno	7	3	v	v	c	v	non	non	1
8	27	Lady	Nenno	7	3	c	v	c	v	non	non	1
9	30	Lady	Nenno	7	3	v	Aucun	c	v	non	non	1
1	15	Shan	Yannick	12	3	v	c	c	v	non	non	1
2	20	Shan	Yannick	12	3	c	Aucun	c	v	non	non	1
3	25	Shan	Yannick	12	3	c	Aucun	c	v	non	non	1
4	30	Shan	Yannick	12	3	c	Aucun	c	v	non	non	1
5	31	Shan	Yannick	12	3	v	Aucun	c	v	non	non	1
6	41	Shan	Yannick	12	3	c	Aucun	c	v	non	non	1
1	7	Wallace	Vishnu	1	3	c	Aucun	c	v	non	non	1
2	10	Wallace	Vishnu	1	3	v	Aucun	c	v	non	non	1
3	15	Wallace	Vishnu	1	3	v	Aucun	c	v	non	non	1
4	20	Wallace	Vishnu	1	3	c	Aucun	c	v	non	non	1
5	21	Wallace	Vishnu	1	3	c	Aucun	c	v	non	non	1
1	1	Wallace	Yannick	8	4	v	Aucun	c	v	non	non	1
2	18	Wallace	Yannick	8	4	v	Aucun	c	v	non	non	1
3	19	Wallace	Yannick	8	4	v	Aucun	c	v	non	non	1
4	28	Wallace	Yannick	8	4	c	Aucun	c	v	non	non	1
5	33	Wallace	Yannick	8	4	c	v	c	v	non	non	1
6	35	Wallace	Yannick	8	4	c	c	c	v	non	non	1
7	37	Wallace	Yannick	8	4	v	c	c	v	non	non	1
8	39	Wallace	Yannick	8	4	c	Aucun	c	v	non	non	1
9	43	Wallace	Yannick	8	4	c	Aucun	c	v	non	non	1
1	1	Wotan	Yannick	4	4	v	v	c	v	non	non	1
2	5	Wotan	Yannick	4	4	c	Aucun	c	v	non	non	1
3	18	Wotan	Yannick	4	4	c	Aucun	c	v	non	non	1
4	19	Wotan	Yannick	4	4	v	Aucun	c	v	non	non	1
5	26	Wotan	Yannick	4	4	c	v	c	v	non	non	1
6	28	Wotan	Yannick	4	4	c	v	c	v	non	non	1
7	33	Wotan	Yannick	4	4	v	Aucun	c	v	non	non	1
8	35	Wotan	Yannick	4	4	c	v	c	v	non	non	1
9	37	Wotan	Yannick	4	4	c	v	c	v	non	non	1
10	39	Wotan	Yannick	4	4	c	Aucun	c	v	non	non	1
11	47	Wotan	Yannick	4	4	c	Aucun	c	v	non	non	1
12	54	Wotan	Yannick	4	4	c	Aucun	c	v	non	non	1
13	60	Wotan	Yannick	4	4	c	v	c	non	non	v	4
14	62	Wotan	Yannick	4	4	c	v	c	non	non	v	4
15	63	Wotan	Yannick	4	4	v	v	c	v	non	non	1
16	64	Wotan	Yannick	4	4	v	v	c	v	non	non	1
17	69	Wotan	Yannick	4	4	c	v	non	v	c	non	3
18	72	Wotan	Yannick	4	4	v	Aucun	c	v	non	non	1
19	75	Wotan	Yannick	4	4	v	c	c	v	non	non	1
20	76	Wotan	Yannick	4	4	c	v	c	non	non	v	4
21	77	Wotan	Yannick	4	4	v	Aucun	c	v	non	non	1
1	1	Uruk	Yannick	11	4	v	Aucun	c	v	non	non	1
1	1	Wallace	Lady	7	4	c	v	c	v	non	non	1
2	5	Wallace	Lady	7	4	v	Aucun	c	v	non	non	1
1	1	Walt	Yannick	3	4	v	Aucun	c	v	non	non	1
2	5	Walt	Yannick	3	4	v	v	c	v	non	non	1
1	1	Lady	Yannick	1	4	v	Aucun	c	v	non	non	1
2	5	Lady	Yannick	1	4	c	v	c	non	non	v	4
1	1	Yannick	Nema	1	4	v	Aucun	c	v	non	non	1
2	5	Yannick	Nema	1	4	v	Aucun	c	v	non	non	1
1	1	Nereis	Lady	4	4	v	Aucun	c	v	non	non	1
2	5	Nereis	Lady	4	4	c	v	c	v	non	non	1
1	1	Walt	Lady	2	4	v	c	c	v	non	non	1
2	5	Walt	Lady	2	4	c	Aucun	c	v	non	non	1
3	18	Walt	Lady	2	4	v	v	c	v	non	non	1
4	19	Walt	Lady	2	4	c	v	c	v	non	non	1
5	20	Walt	Lady	2	4	c	v	c	v	non	non	1
6	26	Walt	Lady	2	4	v	Aucun	c	v	non	non	1
7	28	Walt	Lady	2	4	v	v	c	v	non	non	1
8	33	Walt	Lady	2	4	c	Aucun	c	v	non	non	1
9	35	Walt	Lady	2	4	v	v	c	v	non	non	1
10	37	Walt	Lady	2	4	c	v	c	v	non	non	1
11	39	Walt	Lady	2	4	c	v	c	v	non	non	1
1	2	Uruk	Wotan	7	4	v	Aucun	c	v	non	non	1
1	1	Nereis	Yannick	5	4	v	Aucun	c	v	non	non	1
1	1	Wallace	Nereis	3	4	v	Aucun	c	v	non	non	1
2	5	Wallace	Nereis	3	4	v	Aucun	c	v	non	non	1
1	1	Wotan	Lady	3	4	v	Aucun	c	v	non	non	1
2	5	Wotan	Lady	3	4	v	Aucun	c	v	non	non	1
3	18	Wotan	Lady	3	4	c	v	c	non	non	v	4
4	19	Wotan	Lady	3	4	v	Aucun	c	v	non	non	1
5	26	Wotan	Lady	3	4	v	Aucun	c	v	non	non	1
6	28	Wotan	Lady	3	4	v	Aucun	c	v	non	non	1
7	33	Wotan	Lady	3	4	c	Aucun	c	v	non	non	1
8	35	Wotan	Lady	3	4	c	v	c	non	non	v	4
9	37	Wotan	Lady	3	4	c	v	c	non	non	v	4
10	39	Wotan	Lady	3	4	c	v	c	non	non	v	4
11	43	Wotan	Lady	3	4	v	Aucun	c	v	non	non	1
12	60	Wotan	Lady	3	4	c	Aucun	c	v	non	non	1
13	62	Wotan	Lady	3	4	c	v	c	non	non	v	4
1	4	Nema	Lady	2	4	c	Aucun	c	v	non	non	1
2	5	Nema	Lady	2	4	c	v	c	v	non	non	1
3	18	Nema	Lady	2	4	c	Aucun	c	v	non	non	1
4	19	Nema	Lady	2	4	v	Aucun	c	v	non	non	1
5	25	Nema	Lady	2	4	v	Aucun	c	v	non	non	1
6	27	Nema	Lady	2	4	c	v	c	non	non	v	2
7	32	Nema	Lady	2	4	c	v	c	non	non	v	4
8	34	Nema	Lady	2	4	c	Aucun	c	v	non	non	1
9	36	Nema	Lady	2	4	c	v	c	non	non	v	4
10	38	Nema	Lady	2	4	c	v	c	non	non	v	4
11	42	Nema	Lady	2	4	v	v	c	v	non	non	1
1	1	Wallace	Nema	9	4	c	Aucun	c	v	non	non	1
2	5	Wallace	Nema	9	4	c	Aucun	c	v	non	non	1
1	1	Uruk	Lady	10	4	c	Aucun	c	v	non	non	1
1	1	Vishnu	Yannick	7	4	c	Aucun	c	v	non	non	1
2	5	Vishnu	Yannick	7	4	c	Aucun	c	v	non	non	1
3	18	Vishnu	Yannick	7	4	v	v	c	v	non	non	1
4	19	Vishnu	Yannick	7	4	v	c	c	v	non	non	1
5	26	Vishnu	Yannick	7	4	c	Aucun	c	v	non	non	1
6	28	Vishnu	Yannick	7	4	v	Aucun	c	v	non	non	1
7	33	Vishnu	Yannick	7	4	v	Aucun	c	v	non	non	1
1	1	Lady	Nenno	7	4	c	v	c	non	non	v	4
2	5	Lady	Nenno	7	4	c	v	c	non	non	v	4
3	18	Lady	Nenno	7	4	c	v	c	non	non	v	4
4	19	Lady	Nenno	7	4	v	v	c	v	non	non	1
5	26	Lady	Nenno	7	4	c	v	c	non	non	v	4
6	28	Lady	Nenno	7	4	c	v	c	non	non	v	4
1	1	Shan	Yannick	12	4	c	v	c	non	non	v	4
2	18	Shan	Yannick	12	4	c	c	c	v	non	non	1
3	19	Shan	Yannick	12	4	v	v	non	v	c	non	3
4	21	Shan	Yannick	12	4	c	Aucun	c	v	non	non	1
5	26	Shan	Yannick	12	4	v	c	c	v	non	non	1
6	28	Shan	Yannick	12	4	c	c	c	v	non	non	1
7	33	Shan	Yannick	12	4	c	Aucun	c	v	non	non	1
8	35	Shan	Yannick	12	4	c	Aucun	c	v	non	non	1
9	37	Shan	Yannick	12	4	c	c	c	v	non	non	1
10	39	Shan	Yannick	12	4	c	c	c	v	non	non	1
1	5	Wallace	Vishnu	1	4	c	Aucun	c	v	non	non	1
2	11	Wallace	Vishnu	1	4	c	Aucun	c	v	non	non	1
3	18	Wallace	Vishnu	1	4	v	Aucun	c	v	non	non	1
4	19	Wallace	Vishnu	1	4	c	Aucun	c	v	non	non	1

## Sheet: Hierarchical test in the group
		LOOSER
WINNER		Jeanne	Lady	Nereis	Olga	Patsy	Gaetan	Shan	Ulysse	Uhlrich	Uruk	Vishnu	Wallace	Wotan	Walt	Yang	Yin	Yoh	Yannick	Olli	Nema	Lassa	Patchouli	Nenno	Olaf	Alvin	Alaryc	Abricot	Anubis
	Jeanne		0	0	0	0	0	0	0	0	0	1	0	0	0	0	0	0	0	3	0	0	0	0	0	0	0	1	0
	Lady	1		0	0	0	0	0	0	0	0	0	0	0	0	7	0	1	6	1	1	0	0	1	0	1	0	0	0
	Nereis	0	1		3	2	0	0	0	0	0	11	0	11	6	3	9	5	3	0	3	0	0	13	5	4	4	2	25
	Olga	0	0	0		1	0	0	0	0	0	0	0	0	0	3	0	1	0	0	0	0	0	0	0	0	0	0	0
	Patsy	0	0	0	0		1	0	0	0	0	0	0	0	0	4	0	1	5	0	0	0	3	0	0	0	0	0	1
	Gaetan	0	0	8	0	2		0	0	0	0	0	2	4	1	0	0	0	1	0	1	0	0	1	0	0	0	0	0
	Shan	0	1	20	0	0	0		2	5	10	14	21	3	2	1	0	1	4	1	3	0	2	2	16	2	2	1	10
	Ulysse	0	2	9	3	2	1	0		2	1	8	7	7	2	4	5	3	7	1	4	0	7	1	0	0	2	1	1
	Uhlrich	0	2	4	0	0	0	0	1		0	1	0	13	1	11	4	1	5	0	2	0	0	2	1	0	0	1	0
	Uruk	0	1	10	0	2	0	0	3	7		20	44	6	0	3	4	1	8	0	2	0	0	2	0	1	1	0	2
	Vishnu	1	2	29	2	1	0	0	0	5	0		1	20	3	6	6	1	25	5	8	1	2	3	8	1	2	0	0
	Wallace	0	0	11	0	1	0	0	0	8	0	47		9	5	8	10	0	9	1	7	0	0	3	4	0	1	1	0
	Wotan	1	0	0	0	1	0	0	1	3	0	4	1		6	16	6	3	19	5	4	3	0	6	1	4	0	0	0
	Walt	3	0	5	0	0	0	0	0	0	0	0	0	0		1	3	2	2	1	4	0	2	0	0	0	0	0	0
	Yang	0	0	0	1	0	0	0	0	0	0	0	0	1	1		0	1	1	2	0	0	2	0	0	0	0	0	2
	Yin	0	0	0	0	4	0	0	0	0	0	0	0	0	0	1		3	9	1	4	0	1	1	2	1	0	0	2
	Yoh	0	0	0	0	0	0	0	0	0	0	0	0	0	0	5	0		4	0	0	3	0	2	2	0	0	0	0
	Yannick	0	0	0	1	0	0	0	0	0	0	0	0	2	4	11	2	1		1	6	2	2	1	4	1	0	0	0
	Olli	0	0	0	0	0	0	0	0	0	0	0	0	0	0	0	1	0	0		0	0	0	0	2	0	0	0	0
	Nema	0	1	0	2	1	0	0	0	0	0	0	0	0	0	3	0	5	3	0		2	2	9	4	1	2	0	2
	Lassa	0	0	0	0	0	0	0	0	0	0	0	0	0	0	0	0	1	0	0	0		0	0	1	0	0	0	0
	Patchouli	0	0	0	0	0	0	0	0	0	0	0	0	0	0	0	0	0	0	1	1	1		0	0	0	2	0	0
	Nenno	0	0	0	0	0	0	0	0	0	0	0	0	0	0	0	0	0	1	0	7	1	0		2	1	5	2	1
	Olaf	0	0	0	0	0	0	0	0	0	0	0	0	0	0	0	0	0	0	0	0	0	1	0		0	0	1	1
	Alvin	0	0	0	0	0	0	0	0	0	0	0	0	0	0	0	0	0	0	0	0	0	0	0	0		0	0	0
	Alaryc	0	0	0	0	0	0	0	0	0	0	0	0	0	0	0	0	0	0	0	0	0	1	0	0	0		0	1
	Abricot	0	0	0	0	0	0	0	0	0	0	0	0	0	0	0	0	0	0	0	0	0	0	0	0	1	0		0
	Anubis	0	0	1	0	0	0	0	0	0	0	0	0	0	0	0	0	0	0	0	0	0	0	1	1	0	0	1
Hierarchical rank	Subject
1	Shan
2	Uruk
3	Ulysse
4	Gaëtan
5	Wallace
6	Vishnu
7	Ulrich
8	Nereis
9	Wotan
10	Walt
11	yin
12	Lady
13	Yannick
14	Nema
15	Olga
16	Patsy
17	Yoh
18	Jeanne
19	Nenno
20	Yang
21	Patchouli
22	Lassa
23	Olli
24	Olaf
25	Alrayc
26	Anubis
27	Abricot
28	Alvin
Subjects in bold characters are those involved in the study.

## Sheet: Hierarchical test per dyad
Subject 1	Number of banana obtained	Subject 2	Number of banana obtained	Dominant
Wallace	9	Yannick	1	Wallace
Wotan	10	Yannick	0	Wotan
Uruk	10	Yannick	0	Uruk
Wallace	10	Lady	0	Wallace
Walt	9	Yannick	1	Walt
Uruk	10	Wotan	0	Uruk
Lady	9	Yannick	1	Lady
Nereis	9	Yannick	1	Nereis
Vishnu	10	Yannick	0	Vishnu
Wallace	10	Nereis	0	Wallace
Yannick	10	Nema	0	Yannick
Nereis	10	Lady	0	Nereis
Lady	2	Nema	8	Nema
Wotan	8	Lady	2	Wotan
Walt	10	Lady	0	Walt
Wallace	10	Wotan	0	Wallace
Wallace	10	Nema	0	Wallace
Uruk	10	Lady	0	Uruk
Shan	10	Yannick	0	Shan
Lady	9	Nenno	1	Lady

## Sheet: Data acquisition sheet
visual barrier1	visual barrier 2	Condition	Subject A	Subject C	First direction of Subject A	Food 1 obtained by A?	Food 2 obtianed by A?	First direction of Subject B	Food 1 obtained by B?	Food 2 obtained by B?			Legend
C	V	4
V	C	2											c: hidden piece of food
V	C	2											v: visible piece of food
C	V	2											Subject A: name of the subject positioned in area A
C	V	4											Subject C: name of the subject positioned in area C
V	C	3
C	V	3
V	C	1
V	C	2
C	V	3
C	V	1
C	V	2
V	C	1
C	V	2
C	V	3
C	V	2
V	C	2
V	C	4
C	V	4
V	C	3
V	C	3
C	V	1
V	C	1
C	V	1
V	C	3
C	V	4
V	C	3
C	V	4
V	C	2
V	C	3
C	V	3
V	C	1
V	C	4
C	V	1
V	C	4
V	C	1
V	C	4
C	V	1
V	C	4
C	V	2
